# Supplementary material for: Histone deacetylase inhibitors sensitize glioblastoma models to temozolomide and reprogram immunosuppressive myeloid cells
Source: Research Square preprint supplement (doi:10.21203/rs.3.rs-6573675/v1), 2025-05-14
Supplement: Supplementary file 1 [file 4e8dc77427a3fc9aba3cb6b1.pdf]

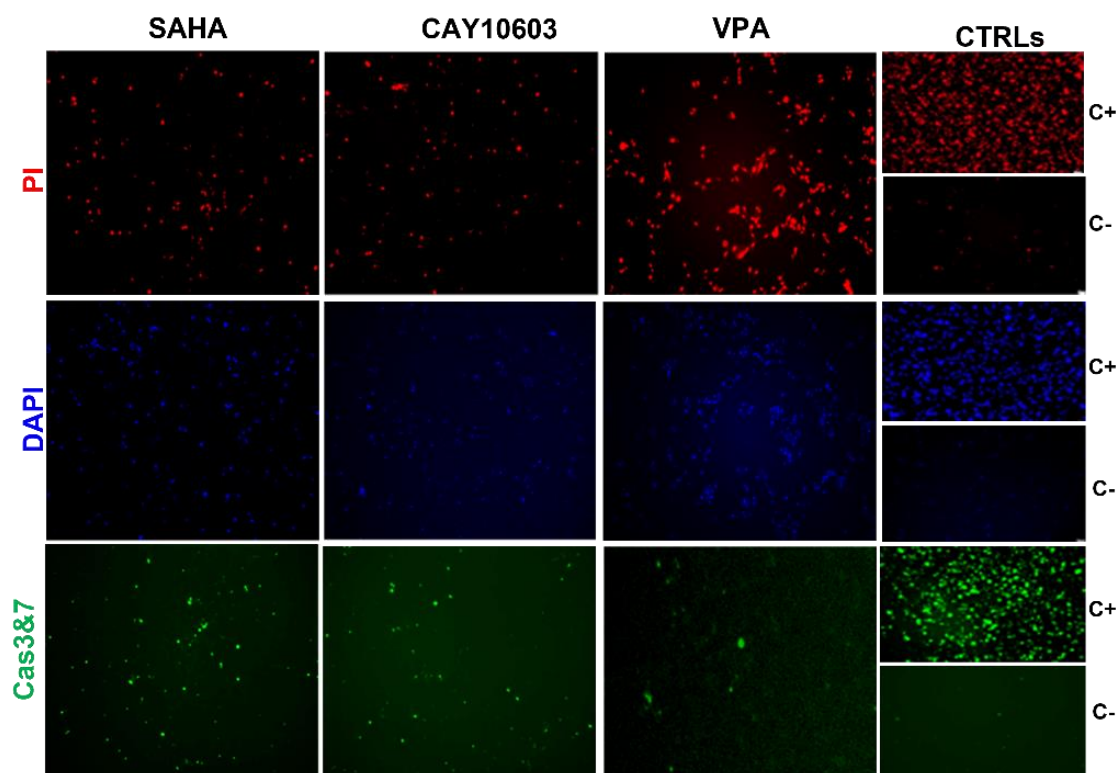

**Fig S2: Variable HDACis induce early vs late apoptosis in GBM cells.** U87 cells were treated with SAHA, CAY10603, and VPA for 48 h at their IC<sub>50</sub> values calculated in **Fig 1**, followed by staining for PI (dead cells/late apoptosis), DAPI (live cells/cell damage), and Caspase 3 & 7 (early apoptotic cells). SAHA (2.1  $\mu$ M) and CAY10603 (3.3  $\mu$ M) induced early apoptosis and activation of Caspase 3 and 7 in GBM cells. In contrast, VPA (1.82 mM) led to late apoptosis and cell damage, as detected by PI and DAPI staining. Positive controls (C+) were treated with drug concentrations higher than IC<sub>50</sub> value and negative controls (C-) had no drug treatment.
