# Supplementary material for: Histone deacetylase inhibitors sensitize glioblastoma models to temozolomide and reprogram immunosuppressive myeloid cells
Source: Research Square preprint supplement (doi:10.21203/rs.3.rs-6573675/v1), 2025-05-14
Supplement: Supplementary file 2 [file c17d12031e7bebf15e774ad0.pdf]

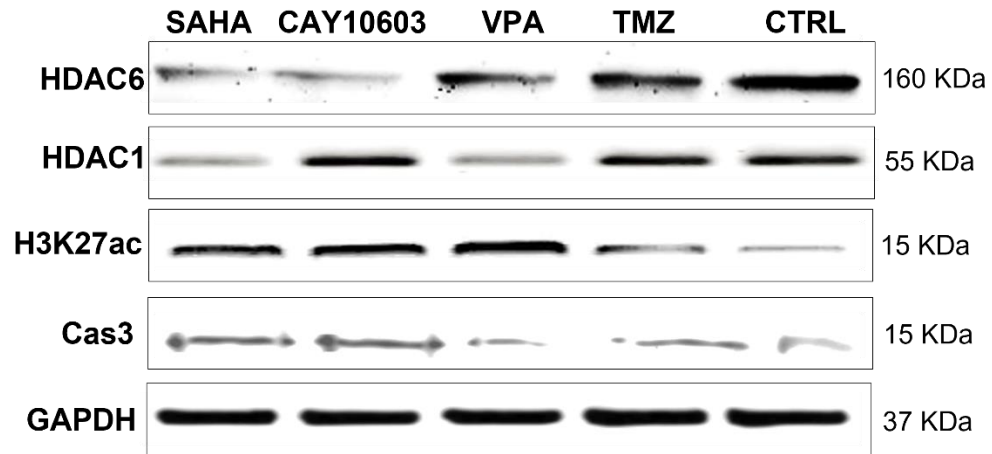

**Fig S1: HDACis reduce epigenetic protein expression and induce apoptosis in GBM cells.** Protein expression of epigenetic markers (HDAC6, HDAC1, and H3K27ac), and apoptosis (Cas3) was evaluated by western blot in U87 cells after 48 hr of TMZ, SAHA, CAY10603, or VPA treatment. GAPDH served as a loading control. (kDa = kilodalton.)
